# Supplementary material for: Control of spin–spin exchange interactions in polynitroxides through inclusion within γ-cyclodextrin
Source: Royal Society of Chemistry journal article supplement (doi:10.1039/c2ra22285j), 2012-11-20
Supplement: c2ra22285j.pdf [file c2ra22285j.pdf]

## Electronic Supplementary Information (ESI)

### Control of spin-spin exchange interactions in polynitroxides through inclusion within $\gamma$ -cyclodextrin

Mintu Porel,<sup>a</sup> M. Francesca Ottaviani,<sup>b\*</sup> Steffen Jockusch,<sup>c</sup> Nicholas J. Turro<sup>c\*</sup> and V. Ramamurthy<sup>a\*</sup>

<sup>a</sup>Department of Chemistry, University of Miami, Coral Gables, Florida 33124, United States

<sup>b</sup>Department of Earth, Life and Environmental Sciences (DiSTeVA), University of Urbino, 61029 Urbino, Italy

<sup>c</sup>Department of Chemistry, Columbia University, New York, New York 10027, United States

#### Contents

|         | Content                                                 | Page # |
|---------|---------------------------------------------------------|--------|
| Fig. S1 | EPR titration spectra of T2 with $\gamma$ -CD           | S2     |
| Fig. S2 | EPR titration spectra of T3 with $\gamma$ -CD           | S2     |
| Fig. S3 | EPR spectra of T3 in solution at different temperatures | S3     |
| Fig. S4 | Arrhenius plot for T2 in $\gamma$ -CD                   | S3     |
| Fig. S5 | Arrhenius plot for T3 in solution and $\gamma$ -CD      | S4     |

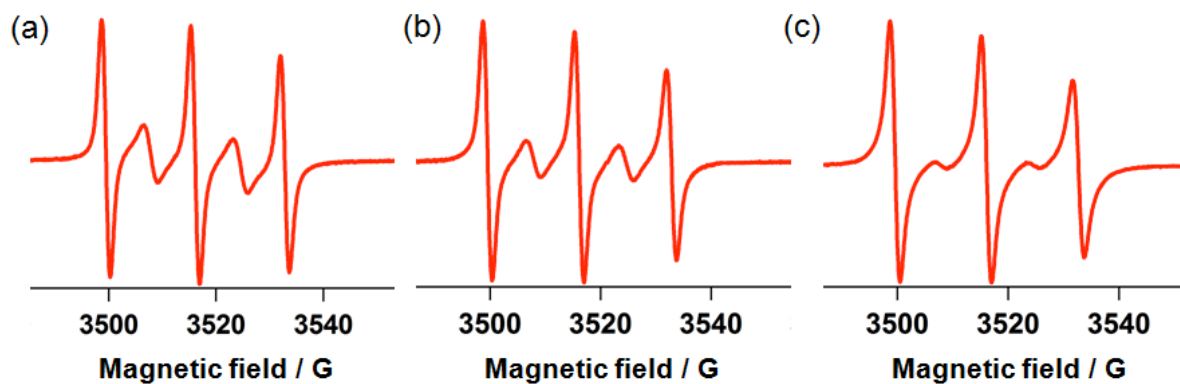

**Fig. S1** EPR titration spectra of T2 with  $\gamma$ -CD; (a)  $[T2]/[\gamma\text{-CD}] = 1:0$ , (b)  $[T2]/[\gamma\text{-CD}] = 1:4$  and  $[T2]/[\gamma\text{-CD}] = 1:20$ ;  $[T2] = 0.1 \text{ mM}$  at 295 K.

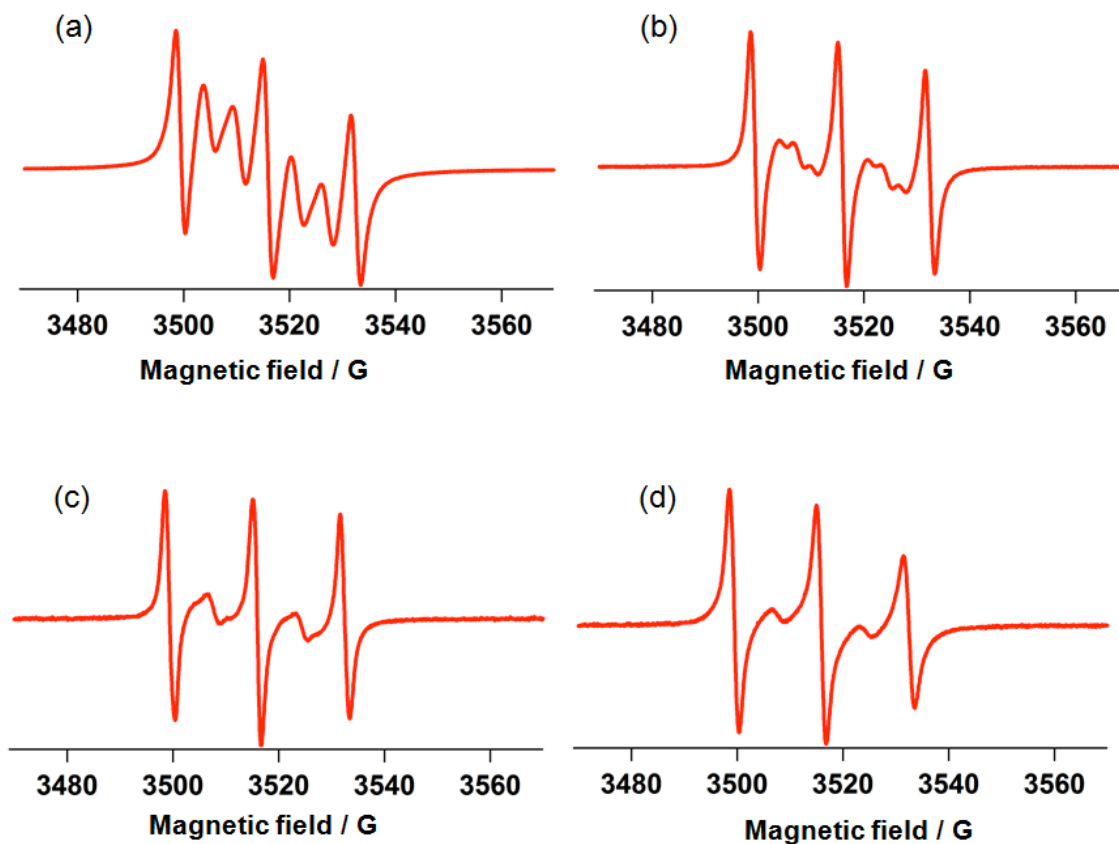

**Fig. S2** EPR titration spectra of T3 with  $\gamma$ -CD; (a)  $[T3]/[\gamma\text{-CD}] = 1:0$ , (b)  $[T3]/[\gamma\text{-CD}] = 1:2$ , (c)  $[T3]/[\gamma\text{-CD}] = 1:4$  and (d)  $[T3]/[\gamma\text{-CD}] = 1:10$ ;  $[T3] = 0.1 \text{ mM}$  at 295 K.

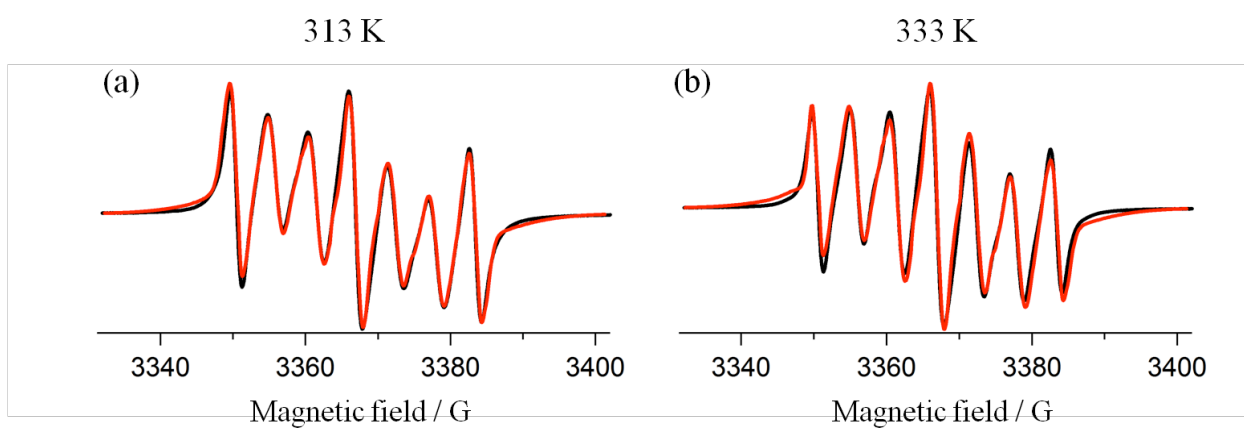

**Fig. S3** EPR spectra of T3 in 1:1 MeOH/water at different temperatures.

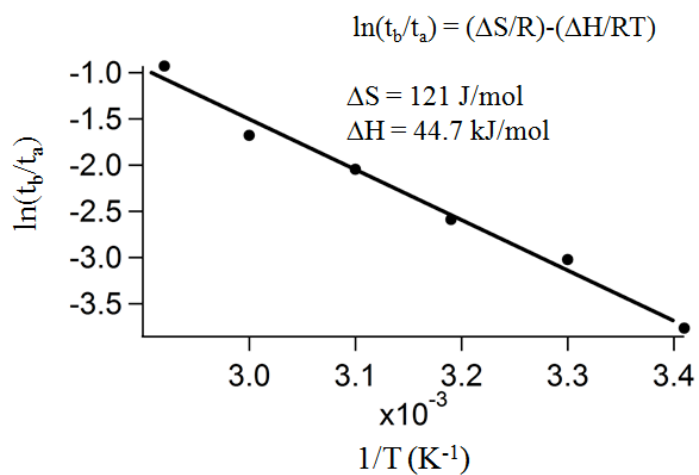

**Fig. S4** Arrhenius plot for T2 in presence of 20 equivalent of  $\gamma$ -CD. ( $t_b = t_{\text{close}}$ ;  $t_a = t_{\text{far}}$ )

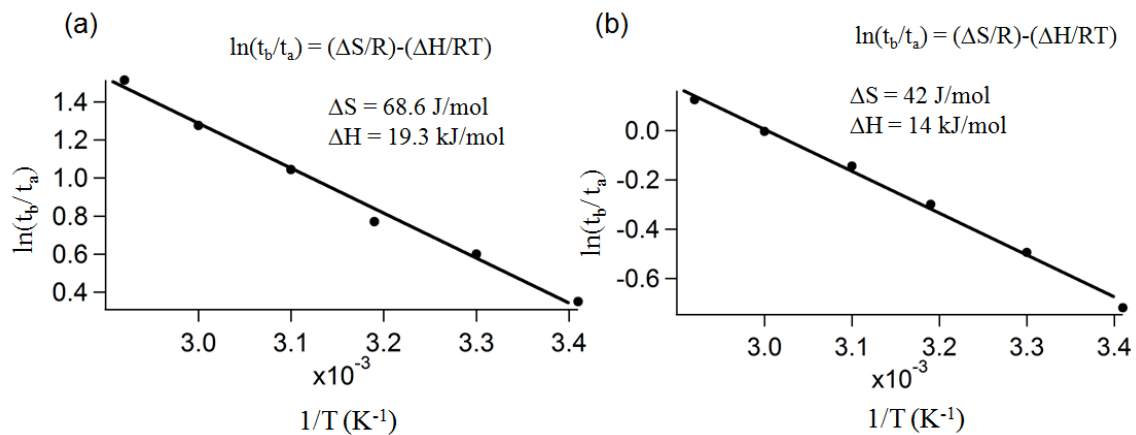

**Fig. S5** Arrhenius plot for T3 in (a) 1:1 MeOH/water and (b) in presence of 20 equivalent  $\gamma$ -CD. ( $t_b = t_{\text{close}}$ ;  $t_a = t_{\text{far}}$ )
